# Supplementary material for: N and S co-doped graphene enfolded Ni–Co-layered double hydroxides: an excellent electrode material for high-performance energy storage devices
Source: Royal Society of Chemistry journal article supplement (doi:10.1039/d1ra07235h), 2021-01-01
Supplement: d1ra07235h1.pdf [file d1ra07235h1.pdf]

Electronic Supporting Information (ESI) for

**N and S co-doped graphene enfolded Ni-Co-layered double hydroxides: An excellent electrode material for high-performance energy storage devices**

Firoz Khan

Interdisciplinary Research Center for Renewable Energy and Power System (IRC-REPS), King Fahd University of Petroleum and Minerals (KFUPM), Dhahran-31261, Kingdom of Saudi Arabia.

\*Corresponding author: Tel: +966 13 8607019; Fax: +966 13 8607312;

E-mail: [firoz.khan@kfupm.edu.sa](mailto:firoz.khan@kfupm.edu.sa) (Firoz Khan)

## **Experimental details**

### *Purification of graphite flakes*

First, 30 mL concentrated HF was taken into a plastic beaker then 2 g graphite was slowly added to it. A homogeneous mixture was prepared via mechanical stirring at room temperature. After 1 h, the graphite flakes were allowed to settle down and the acid was decanted. The graphite flakes were washed thoroughly using a large amount of deionized water (DI water) to achieve pH = 7. Finally, the graphite flakes were dispersed in 20 mL acetone followed by drying in the vacuum oven at 100 °C.

### *GO synthesis*

Modified Hummer's method was used for graphene oxide (GO) synthesis [1,2]. For the oxidation of graphite flakes, 1 g of NaNO<sub>3</sub> was mixed properly with the purified graphite flakes (2 g). A concentrated H<sub>2</sub>SO<sub>4</sub> was taken into a glass beaker contained in the ice bath. Then the mixture was slowly added to H<sub>2</sub>SO<sub>4</sub>. Then KMnO<sub>4</sub> (6 g) was added under vigorous stirring, and the temperature was retained < 20 °C. After stirring 10 min, the ice bath was replaced with a water bath and the temperature was raised to 35 °C. The mixture was kept under stirring at 35 °C for 24 h. 150 mL of DI water was added to the mixture followed by adding 2.5 mL H<sub>2</sub>O<sub>2</sub> and 240 mL DI water to complete the oxidation of graphite. Finally, it was washed with HCl, DI water, and ethanol. Then it will be dried using the vacuum at a temperature of 25 °C.

The oxidized graphite flakes were dispersed in the DI water (2 mg/mL). The exfoliation of GO nanosheets was achieved via 2 h of ultra-sonication.

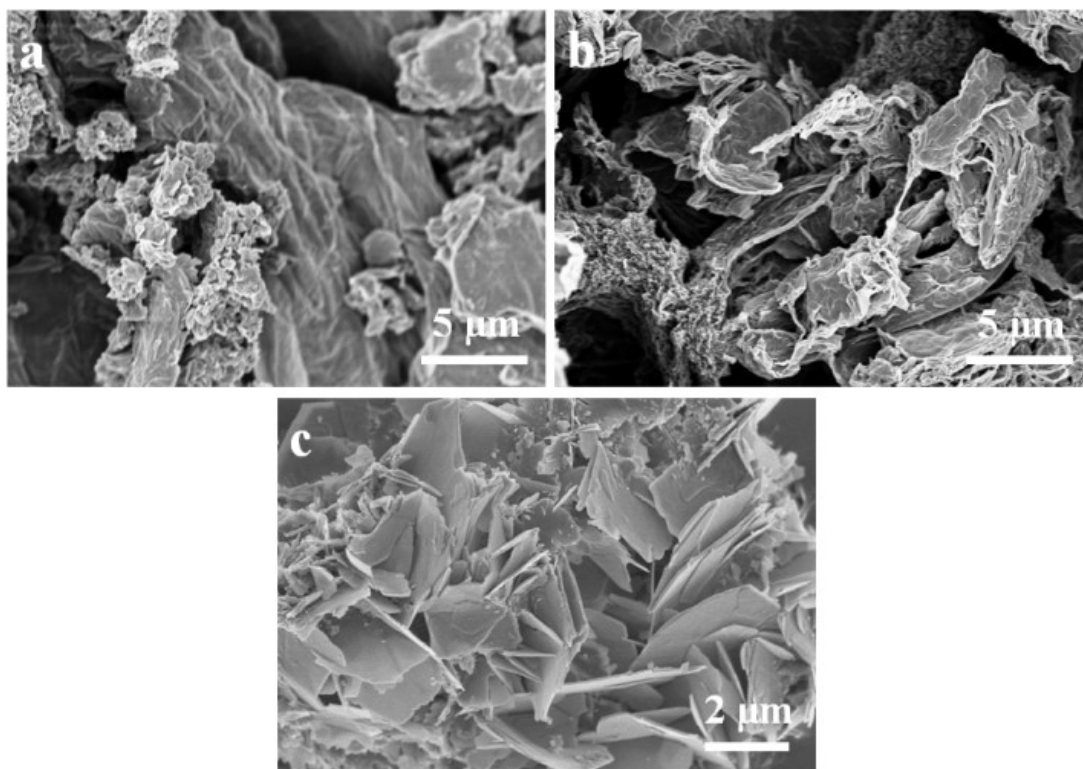

**Fig. S1.** FE-SEM images of (a) GO, (b) rGO-NS, and (c) Ni-Co-LDH.

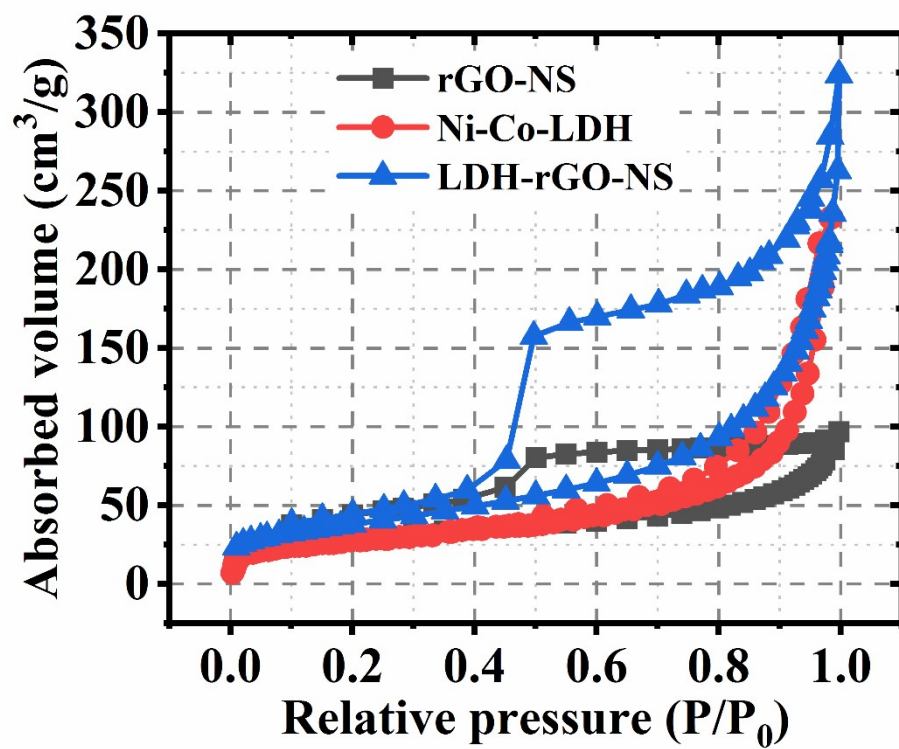

Fig. S2. Nitrogen adsorption-desorption isotherms for rGO-NS, Ni-Co-LDH, and LDH-rGO-NS.

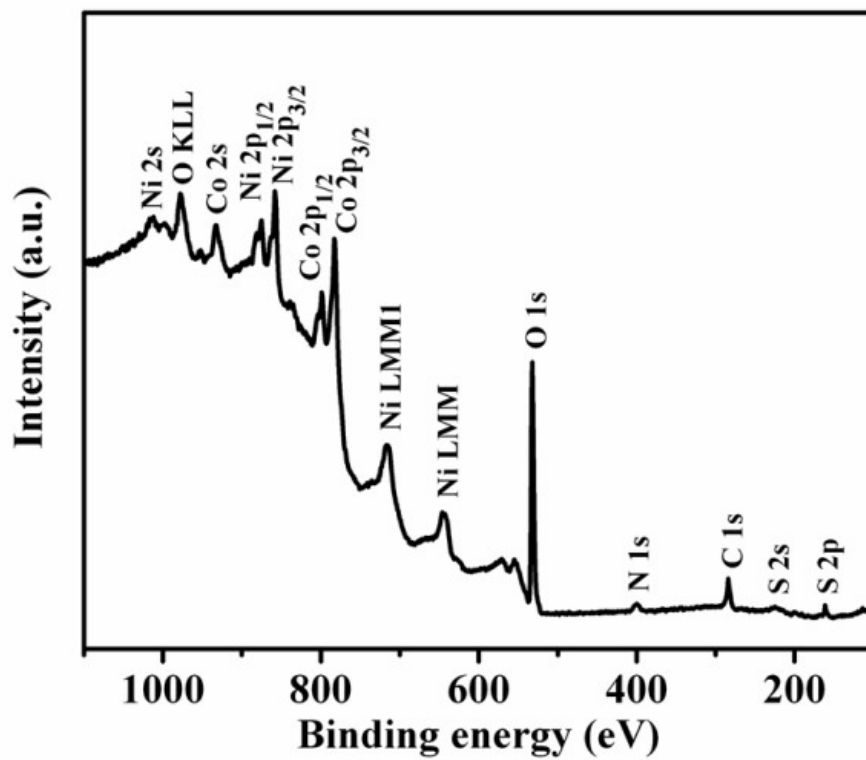

**Fig. S3.** XPS survey of LDH-rGO-NS, confirming the presence of the C, Ni, Co, O, S, and N elements.

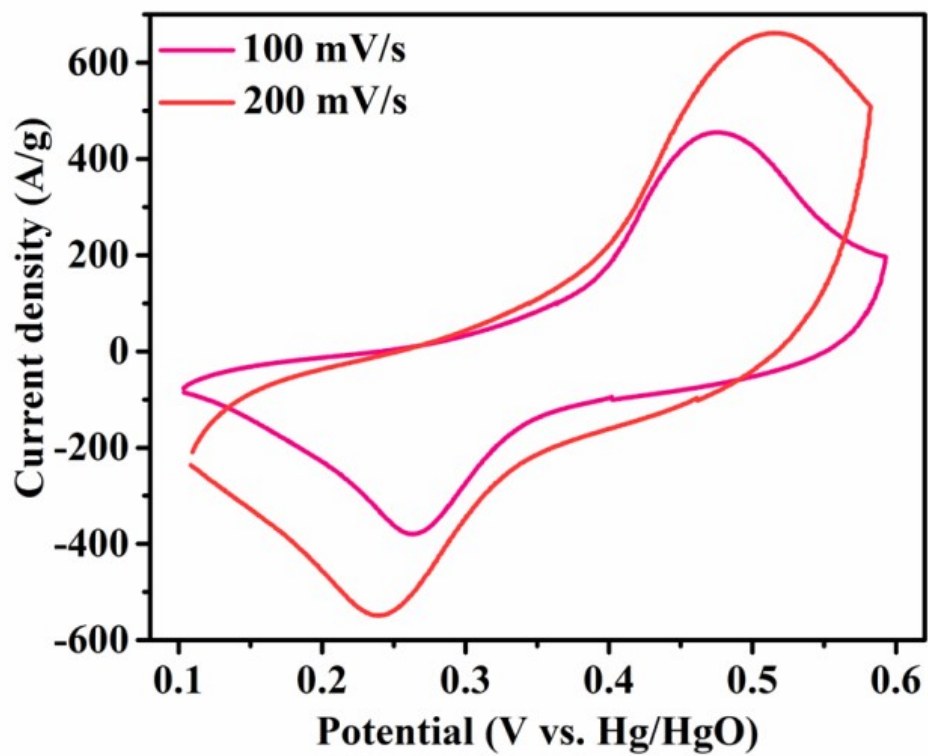

**Fig. S4.** CV of LDH-rGO-NS electrode at the scan rate of 100 and 200 mV/s.

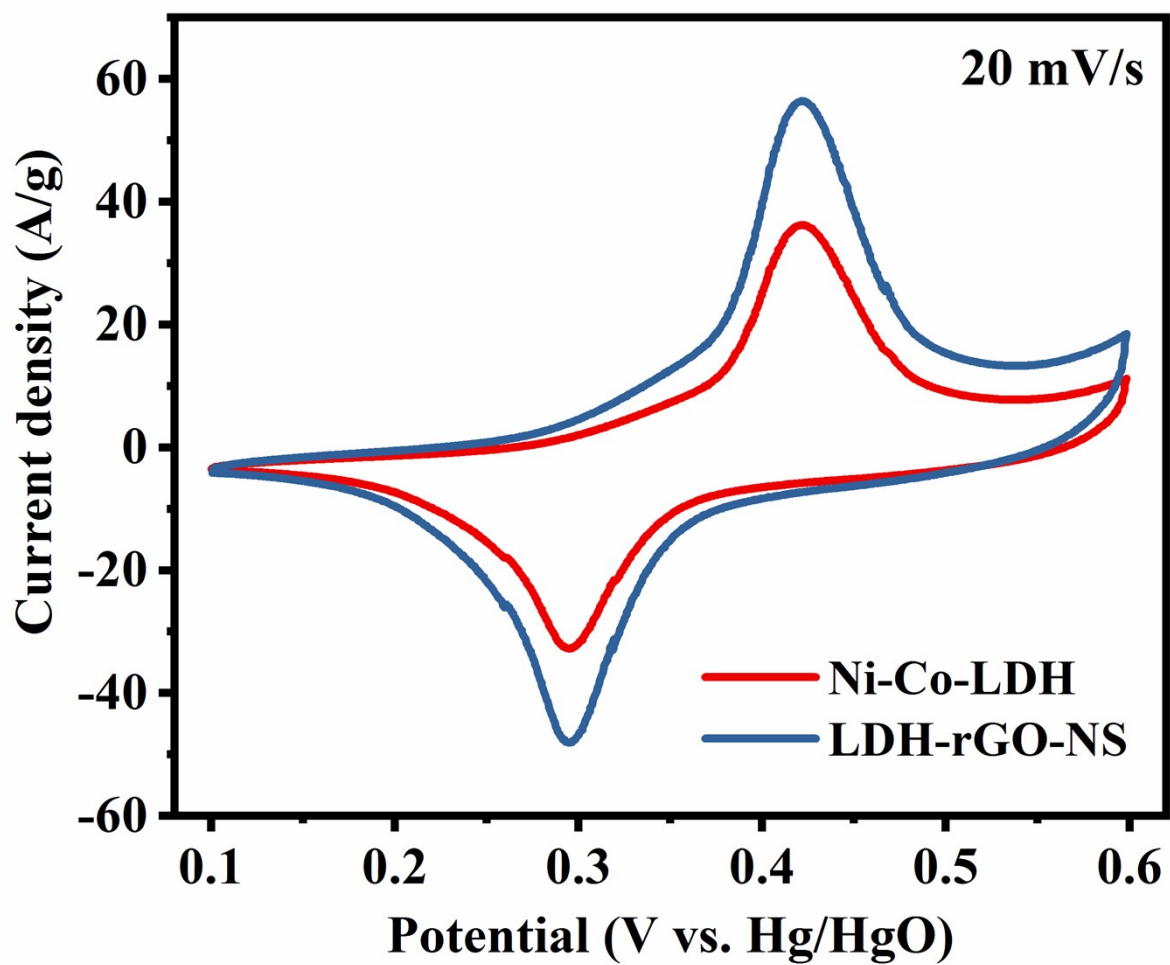

Fig. S5. CV of Ni-Co-LDH and LDH-rGO-NS electrode at the scan rate of 20 mV/s.

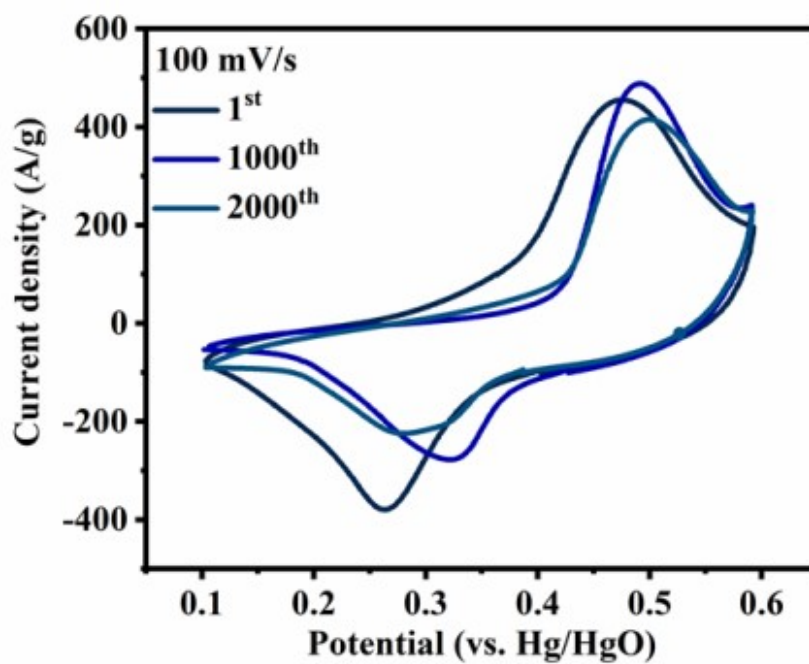

**Fig. S6.** CV of LDH-rGO-NS electrode for 1<sup>st</sup>, 1000<sup>th</sup> and 2000<sup>th</sup> cycle at a scan rate of 100 mV/s. The obtained retention rate after 2000 cycles is ~71%.



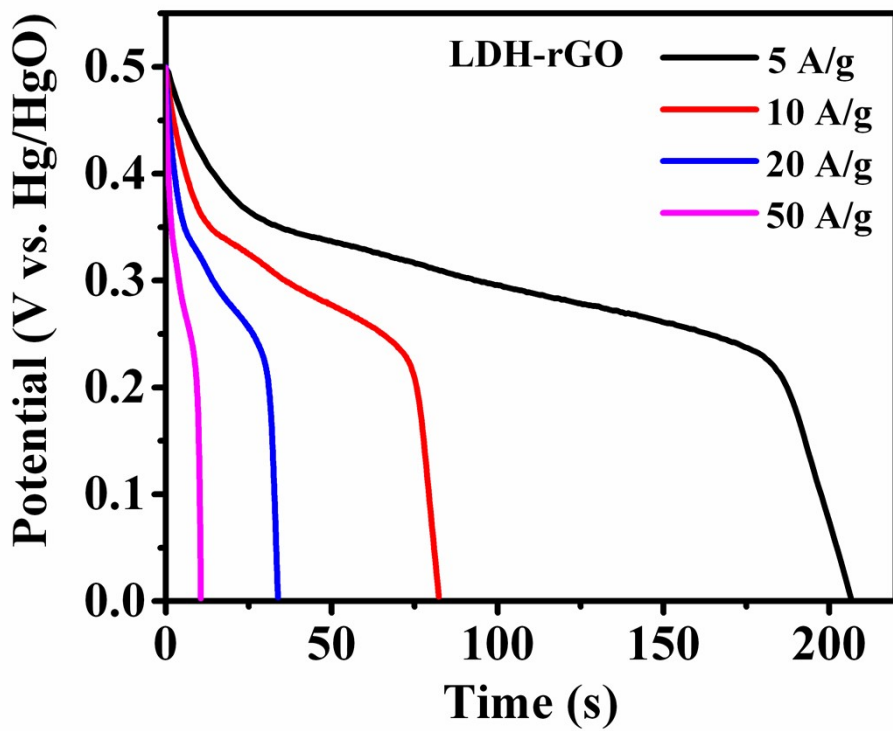

Fig. S7. Specific capacity as a function of discharge current density of LDH-rGO electrode.

## References

- [1] Hummers WS, Offeman RE. Preparation of Graphitic Oxide. *J Am Chem Soc* 80 (1958) 1339.
- [2] Kovtyukhova NI, Ollivier PJ, Martin BR, Mallouk TE, Chizhik SA, Buzaneva EV, et al. Layer-by-layer assembly of ultrathin composite films from micron-sized graphite oxide sheets and polycations. *Chem Mater* 11 (1999) 771-778.
